# Supplementary material
Source: publisher figshare collection journal article supplement (https://acs.figshare.com/ndownloader/files/10400940)
Supplement: Supplementary file 1 [file 10400940]

	Manuscript title: Discovery and Preclinical Development of IIIM-290, an Orally Active Potent Cyclin-dependent Kinase Inhibitor
Entry	Smiles	% Inhibition (± SD) at 0.5 µM			% growth inhibition (± SD) at 10 µM						IC50 (nM) ± SD			GI50 (µM) ± SDb						IC50 (nM) ± SD																			Badapple Promiscuity Analysis
		Cdk-2/A	Cdk-9/T1		HL-60	PC-3	MIAPaCa-2	MCF-7	Caco-2		Cdk-2/A	Cdk-9/T1		HL-60	PC-3	MIAPaCa-2	MCF-7	Caco-2		Cdk-1/cyclin A	Cdk-1/cyclin E	Cdk-2/cyclin O	Cdk-3/cyclin E	Cdk-4/cyclin D3	Cdk-5/ cyclin p25	Cdk-5/ cyclin p35	Cdk-6/cyclin D1	Cdk-6/cyclin D3	Cdk-7/cyclin H	Cdk-9/cyclin K		Water solubility (ug/ml)	LogP	Log D	pKa	Oral bioavailability	LD50 (rats) (g/kg)		p Score	advisory
1	O=C2C=C(C)OC1=C([C@]3([H])[C@H](O)CN(C)CC3)C(O)=CC(O)=C12	10 ± 2.3	75 ± 2.3		83 ± 3.4	33 ± 3.5	2 ± 0.4	15 ± 1.2	12 ± 0.3		7300 ± 89	300 ± 15		10 ± 0.8	19 ± 1.5	19 ± 2.9	28 ± 2.5	25 ± 2.1																					~	None
8a	O=C2C=C(C)OC1=C([C@]4([H])[C@H](O)CN(C)CC4)C(OCC3=CC=CC=C3)=CC(O)=C12	10 ± 0.7	0		24 ± 1.2	41 ± 0.6	14 ± 0.8	1 ± 2.3	18 ± 0.5																														~	None
8b	O=C2C=C(C)OC1=C([C@]4([H])[C@H](O)CN(C)CC4)C(OCC3=CC=C(OC)C=C3)=CC(O)=C12	10 ± 0.9	0		23 ± 1.3	35 ± 2.1	15 ± 0.4	16 ± 1.3	8 ± 0.4																														~	None
8c	O=C2C=C(C)OC1=C([C@]4([H])[C@H](O)CN(C)CC4)C(OCC3=CC=C(Br)C=C3)=CC(O)=C12	0	0		27 ± 0.3	17 ± 0.6	13 ± 1.2	14 ± 1.9	13 ± 2.8																														~	None
8d	O=C2C=C(C)OC1=C([C@]4([H])[C@H](O)CN(C)CC4)C(OCC3=CC=C([N+]([O-])=O)C=C3)=CC(O)=C12	0	5 ± 1.5		14 ± 0.7	23 ± 0.9	12 ± 0.3	39 ± 1.3	14 ± 1.9																														~	None
8e	O=C2C=C(C)OC1=C([C@]4([H])[C@H](O)CN(C)CC4)C(OCC3=C(Br)C=CC=C3)=CC(O)=C12	6 ± 1.1	0		3 ± 0.4	32 ± 1.3	30 ± 2.1	45 ± 2.5	35 ± 2.9																														~	None
8f	O=C2C=C(C)OC1=C([C@]4([H])[C@H](O)CN(C)CC4)C(OC/C=C/C3=CC=CC=C3)=CC(O)=C12	7 ± 0.4	8 ± 0.5		21 ± 2.5	18 ± 1.4	11 ± 0.7	7 ± 0.2	9 ± 0.3																														~	None
8g	O=C2C=C(C)OC1=C([C@]4([H])[C@H](O)CN(C)CC4)C(OCC3=CC=CO3)=CC(O)=C12	7 ± 1	8 ± 0.2		32 ± 1.2	14 ± 0.2	7 ± 0.3	6 ± 0.5	17 ± 1.7																														~	None
8h	O=C2C=C(C)OC1=C([C@]4([H])[C@H](O)CN(C)CC4)C(OCC3=CC=CS3)=CC(O)=C12	10 ± 1.2	0		22 ± 0.3	23 ± 1.3	13 ± 1.7	20 ± 0.7	33 ± 0.4																														~	None
9a	O=C2C=C(C)OC1=C([C@]3([H])[C@H](O)CN(C)CC3)C(O)=C(CN(CC)CC)C(O)=C12	0	4 ± 0.9		47 ± 1.4	2 ± 0.3	27 ± 2.5	24 ± 1.9	17 ± 0.6																														~	None
9b	O=C2C=C(C)OC1=C([C@]3([H])[C@H](O)CN(C)CC3)C(O)=C(CN4CCC(N5CCCCC5)CC4)C(O)=C12	10 ± 1.4	5 ± 4.5		34 ± 2.4	17 ± 0.9	23 ± 2.2	25 ± 2.6	31 ± 1.3																														~	None
9c	O=C2C=C(C)OC1=C([C@]3([H])[C@H](O)CN(C)CC3)C(O)=C(CN4CCCC4)C(O)=C12	7 ± 1.3	5 ± 0.5		38 ± 1.4	10 ± 0.8	28 ± 2.6	12 ± 0.7	22 ± 2.9																														~	None
9d	O=C(N1CCN(CC2=C(O)C(C(C=C(C)O3)=O)=C3C(C4C(O)CN(C)CC4)=C2O)CC1)OC(C)(C)C	2 ± 1.0	0		13 ± 2.4	1 ± 0.2	6 ± 2.5	16 ± 0.8	21 ± 2.1																														~	None
9e	O=C2C=C(C)OC1=C([C@]3([H])[C@H](O)CN(C)CC3)C(O)=C(CN4C(CO)CCC4)C(O)=C12	0	5 ± 0.6		33 ± 2.5	15 ± 1.3	13 ± 1.5	22 ± 4.8	19 ± 3.1																														~	None
9f	O=C2C=C(C)OC1=C([C@]3([H])[C@H](O)CN(C)CC3)C(O)=C(CN4CCC(CC5=CC=CC=C5)CC4)C(O)=C12	4 ± 0.9	0		28 ± 2.6	16 ± 1.9	18 ± 2.5	17 ± 2.7	21 ± 0.6																														~	None
9g	O=C2C=C(C)OC1=C([C@]3([H])[C@H](O)CN(C)CC3)C(O)=C(CN(CC(O)=O)C)C(O)=C12	0	0		23 ± 1.9	20 ± 4.5	16 ± 1.9	27 ± 2.6	18 ± 2.4																														~	None
9h	O=C2C=C(C)OC1=C([C@]3([H])[C@H](O)CN(C)CC3)C(O)=C(CN4CCOCC4)C(O)=C12	0	0		8 ± 0.4	21 ± 2.4	4 ± 0.5	22 ± 4.5	11 ± 4.2																														~	None
9i	O=C2C=C(C)OC1=C([C@]3([H])[C@H](O)CN(C)CC3)C(O)=C(CN4CCC(C5=CC=CC=C5)CC4)C(O)=C12	0	6 ± 0.8		26 ± 0.7	22 ± 2.9	16 ± 0.6	23 ± 2.0	21 ± 0.3																														~	None
9j	O=C(N1CCN(CC2=C(O)C(C(C=C(C)O3)=O)=C3C(C4C(O)CN(C)CC4)=C2O)CC1)OCC	5	0		16 ± 0.9	1 ± 0.5	4 ± 1.9	31 ± 2.7	18 ± 4.3																														~	None
9k	O=C1C=C(C)OC2=C1C(O)=C(CN(C(C)C)C(C)C)C(O)=C2C3C(O)CN(C)CC3	1 ± 0.2	12 ± 0.3		21 ± 0.4	0	11 ± 0.3	33 ± 0.4	22 ± 2.1																														~	None
9l	O=C(C1N(CC2=C(O)C(C(C=C(C)O3)=O)=C3C(C4C(O)CN(C)CC4)=C2O)CC(O)C1)O	10 ± 0.4	8 ± 0.6		28 ± 1.9	0	23 ± 0.4	25 ± 0.6	19 ± 0.4																														~	None
9m	O=C(C1N(CC2=C(O)C(C(C=C(C)O3)=O)=C3C(C4C(O)CN(C)CC4)=C2O)CCC1)O	17 ± 1.2	0		16 ± 0.3	0	10 ± 0.5	21 ± 2.9	30 ± 0.7																														~	None
9n	O=C1C=C(C)OC2=C1C(O)=C(CN4CCN(C)CC4)C(O)=C2C3C(O)CN(C)CC3	0	2 ± 0.8		15 ± 0.9	0	6 ± 0.7	10 ± 3.9	30 ± 0.6																														~	None
9o	O=C1C=C(C)OC2=C1C(O)=C(CN4CCCCC4)C(O)=C2C3C(O)CN(C)CC3	10 ± 1.5	10 ± 1.5		32 ± 0.8	14 ± 3.0	14 ± 0.4	15 ± 2.0	22 ± 0.3																														~	None
10a	O=C1C(C(O)C4=CC=C([N+]([O-])=O)C=C4)=C(C)OC2=C1C(O)=CC(O)=C2C3C(O)CN(C)CC3	6 ± 1.7	8 ± 1.2		0	24 ± 2.0	2 ± 0.3	4 ± 0.7	5 ± 0.9																														~	None
10b	O=C1C(C(O)C4=CC=C(Cl)C=C4)=C(C)OC2=C1C(O)=CC(O)=C2C3C(O)CN(C)CC3	0	0		2 ± 0.4	41 ± 2.8	15 ± 0.8	6 ± 0.7	3 ± 0.4																														~	None
10c	O=C1C(C(O)C4=CC=CC(Cl)=C4)=C(C)OC2=C1C(O)=CC(O)=C2C3C(O)CN(C)CC3	0	4 ± 0.5		22 ± 1.2	31 ± 1.9	2 ± 0.4	5 ± 0.3	4 ± 0.4																														~	None
10d	O=C1C(C(O)C4=C(Br)C=CC=C4)=C(C)OC2=C1C(O)=CC(O)=C2C3C(O)CN(C)CC3	0	29 ± 1.5		52 ± 1.8	45 ± 0.9	10 ± 0.3	21 ± 0.6	7 ± 0.3																														~	None
10e	O=C1C(C(C4=CC=C(F)C(Br)=C4)O)=C(C)OC2=C1C(O)=CC(O)=C2C3C(O)CN(C)CC3	2 ± 0.5	2 ± 0.2		25 ± 2.1	72 ± 0.8	9 ± 1.4	14 ± 0.9	6 ± 0.4																														~	None
10f	O=C1C(C(C4=C(Cl)C=CC=C4Cl)O)=C(C)OC2=C1C(O)=CC(O)=C2C3C(O)CN(C)CC3	0	0		14 ± 1.0	0	0	33 ± 2.6	24 ± 1/4																														~	None
10g	O=C1C(C(O)C4=C(F)C=CC=C4Cl)=C(C)OC2=C1C(O)=CC(O)=C2C3C(O)CN(C)CC3	0	0		49 ± 1.9	0	41 ± 1.9	41 ± 2.9	18 ± 0.5																														~	None
10h	O=C1C(C(O)C4=CSC([N+]([O-])=O)=C4)=C(C)OC2=C1C(O)=CC(O)=C2C3C(O)CN(C)CC3	7 ± 0.7	0		45 ± 3.9	0	41 ± 0.5	20 ± 0.4	3 ± 0.7																														~	None
10i	O=C1C(C(O)C4=CC=C(OC)C(Br)=C4)=C(C)OC2=C1C(O)=CC(O)=C2C3C(O)CN(C)CC3	3 ± 0.4	0		23 ± 0.4	0	3 ± 3.5	41 ± 0.5	0																														~	None
10j	O=C1C(C(O)C4=CC(F)=CC(F)=C4)=C(C)OC2=C1C(O)=CC(O)=C2C3C(O)CN(C)CC3	2 ± 0.8	10 ± 1.2		30 ± 3.2	0	6 ± 2.7	25 ± 0.8	10 ± 0.4																														~	None
10k	O=C1C(C(O)C4=CC(OCC)=CC=C4Br)=C(C)OC2=C1C(O)=CC(O)=C2C3C(O)CN(C)CC3	0	2 ± 0.3		2 ± 0.1	0	4 ± 0.5	9 ± 1.9	5 ± 0.1																														~	None
10l	O=C1C(C(O)C4=CC=CC(Cl)=C4Cl)=C(C)OC2=C1C(O)=CC(O)=C2C3C(O)CN(C)CC3	0	0		12 ± 0.3	20 ± 3.5	2 ± 0.3	7 ± 0.3	3 ± 1.1																														~	None
10m	O=C1C(/C=C/CCCCCCCCCC)=C(C)OC2=C1C(O)=CC(O)=C2C3C(O)CN(C)CC3	5 ± 1.1	11 ± 0.8		9 ± 1.2	0	4 ± 0.6	7 ± 0.5	10 ± 4.5																														~	None
10n	O=C1C(C(O)C4=CC=C(F)C=C4)=C(C)OC2=C1C(O)=CC(O)=C2C3C(O)CN(C)CC3	13 ± 1.6	13 ± 1.6		30 ± 3.4	0	17 ± 0.9	9 ± 0.6	11 ± 2.4																														~	None
11a	O=C1C=C(/C=C/C4=CC=CC=C4)OC2=C1C(O)=CC(O)=C2C3C(O)CN(C)CC3	5.2 ± 0.5	66 ± 2.1		91 ± 2.4	10 ± 2.4	87 ± 1.8	8 ± 0.8	72 ± 2.5		925 ± 12	66 ± 12		1 ± 0.2	58 ± 1.5	2 ± 0.4	31 ± 2.1	3.7 ± 1.4																					~	None
11b	O=C1C=C(/C=C/C4=CC=C(Cl)C=C4)OC2=C1C(O)=CC(O)=C2C3C(O)CN(C)CC3	2 ± 0.9	71 ± 1.9		58 ± 3.2	12 ± 2.0	88 ± 2.1	10 ± 1.3	70 ± 1.9		3300 ± 31	310 ± 14		8 ± 0.3	31 ± 2.1	2 ± 0.4	49 ± 2.4	5.6 ± 1.3																					~	None
11c	O=C1C=C(/C=C/C4=CC=CC(Cl)=C4)OC2=C1C(O)=CC(O)=C2C3C(O)CN(C)CC3	5 ± 0.2	53 ± 2.8		35 ± 1.9	53 ± 1.8	52 ± 3.0	82 ± 1.9	55 ± 2.9		3000 ± 34	280 ± 3		20 ± 1.2	10 ± 0.3	10 ± 1.4	2 ± 0.4	9 ± 0.8																					~	None
11d	O=C1C=C(/C=C/C4=C(Cl)C=CC=C4Cl)OC2=C1C(O)=CC(O)=C2C3C(O)CN(C)CC3	90 ± 0.2	94 ± 0.8		90 ± 2.2	84 ± 2.9	88 ± 3.2	80 ± 1.9	68 ± 2.7		16 ± 1	1.9 ± 1		0.9 ± 0.3	3 ± 0.4	1 ± 0.4	4 ± 0.6	7 ± 1.4		4.93 ± 0.5	75.9 ± 12	138 ± 14	>1000	22.5 ± 2.3	15.5 ± 1.2	15.7 ± 2.3	45 ± 4.2	199 ± 5.7	711 ± 13.2	412 ± 22.1		20	3.09	1.65	5.4	70.7	1		~	None
11e	O=C1C=C(/C=C/C4=C(F)C(F)=C(F)C(F)=C4F)OC2=C1C(O)=CC(O)=C2C3C(O)CN(C)CC3	42 ± 1.6	92 ± 1.2		80 ± 1.4	82 ± 2.6	89 ± 2.8	64 ± 1.8	59 ± 3.5		608 ± 13	11.5 ± 4		3 ± 0.5	2 ± 0.2	1 ± 0.4	8 ± 0.9	8 ± 0.8																					~	None
11f	O=C1C=C(/C=C/C5=C4C=CC=CC4=CC6=C5C=CC=C6)OC2=C1C(O)=CC(O)=C2C3C(O)CN(C)CC3	43 ± 2.5	80 ± 2.4		78 ± 1.5	75 ± 2.0	77 ± 5.2	78 ± 2.4	44 ± 2.3		1800 ± 67	350 ± 14		4 ± 0.2	>100	4 ± 0.6	5 ± 0.3	4 ± 0.5																					~	None
11g	O=C1C=C(/C=C/C4=CC=CC(F)=C4)OC2=C1C(O)=CC(O)=C2C3C(O)CN(C)CC3	53 ± 4.2	88 ± 1.5		60 ± 1.9	67 ± 1.6	67 ± 2.4	83 ± 3.2	61 ± 3.7		466 ± 31	29 ± 1		8 ± 1.1	7 ± 1.4	2 ± 1.1	3 ± 0.5	8 ± 0.7																					~	None
11h	O=C1C=C(/C=C/C4=CC=CC=C4F)OC2=C1C(O)=CC(O)=C2C3C(O)CN(C)CC3	9 ± 1.9	60 ± 5.5		62 ± 0.7	25 ± 1.8	60 ± 0.5	62 ± 2.7	68 ± 2.7		1520 ± 13	260 ± 21		8 ± 0.4	20 ± 2.1	3 ± 1.2	8 ± 3.2	7 ± 1.1																					~	None
11i	O=C1C=C(/C=C/C4=CC=CC=C4Cl)OC2=C1C(O)=CC(O)=C2C3C(O)CN(C)CC3	10 ± 1.8	75 ± 2.4		61 ± 0.4	22 ± 1.1	59 ± 0.9	63 ± 3.2	65 ± 2.5		1410 ± 14	160 ± 9		9 ± 0.8	17 ± 1.4	8 ± 1.3	9 ± 1.4	9 ± 1.0																					~	None
